# Supplementary material for: Substituted kynurenic acid derivatives as fluorophore-based probes for d- and l-amino acid oxidase assays and their in vitro application in eels
Source: Royal Society of Chemistry journal article supplement (doi:10.1039/d3an01325a), 2023-01-01
Supplement: d3an01325a1.pdf [file d3an01325a1.pdf]

## Supporting Information

### **Substituted kynurenic acid derivatives as fluorophore-based probes for D- and L- amino acid oxidase assays and their *in vitro* application in eels**

Tatsuya Sakamoto, Mayu Onozato, Hiroshi Sugasawa, and Takeshi Fukushima\*

Department of Analytical Chemistry, Faculty of Pharmaceutical Sciences, Toho  
University, 2-2-1 Miyama, Funabashi-shi, Chiba 274-8510, Japan

\*Corresponding author:

Takeshi Fukushima, Ph. D.

Faculty of Pharmaceutical Sciences, Toho University

2-2-1 Miyama, Funabashi-shi, Chiba 274-8510, Japan

Tel: +81-47-472-1504; Fax: +81-47-472-1504; E-mail: t-fukushima@phar.toho-u.ac.jp

## Table of contents

### S. 1 Chemicals for compound synthesis

### S. 2 Synthesis and identification

#### S. 2.1 Phenyl-substituted kynurenic acid (KYNA) derivatives

**Scheme S1** Synthetic route of phenyl-substituted KYNA fluorophores

- Ethyl 6-bromokynurenate (**1**)
- 6-Bromokynurenic acid (**2**, Br-KYNA)
- 6-Phenylkynurenic acid (**3a**, Ph-KYNA)
- 6-(2-Methylphenyl)kynurenic acid (**3b**, 2-MePh-KYNA)
- 6-(4-Methylphenyl)kynurenic acid (**3c**, 4-MePh-KYNA)
- 6-(2,6-Dimethylphenyl)kynurenic acid (**3d**, 2,6-diMePh-KYNA)
- 6-(3,5-Dimethylphenyl)kynurenic acid (**3e**, 3,5-diMePh-KYNA)

#### S. 2.2 2-MePh-D, L-kynurenine (KYN)

**Scheme S2** Synthetic route of 2-MePh-D- and -L-KYN

- 1-(2-Amino-5-bromophenyl)-2-chloroethan-1-one (**4**)
- 2-Acetamido-4-(2-amino-5-bromophenyl)-4-oxobutanoic acid (**5**)
- 2-Acetamido-4-(4-amino-2'-methyl-[1,1'-biphenyl]-3-yl)-4-oxobutanoic acid (**6**)
- 5-(2-Methylphenyl)- D, L-kynurenine (2-MePh-D, L-KYN)

### S. 3 Supplementary experiments and results

#### S. 3.1 Excitation, fluorescence, and UV-Vis absorption spectra

- Fig. S1** a) Excitation (dashed line) and fluorescence (solid line) spectra and b) UV-Vis absorption spectrum of MeS-KYNA.
- Fig. S2** a) Excitation (dashed line) and fluorescence (solid line) spectra and b) UV-Vis absorption spectrum of Ph-KYNA.
- Fig. S3** UV-Vis absorption spectrum of 2-MePh-KYNA.
- Fig. S4** a) Excitation (dashed line) and fluorescence (solid line) spectra and b) UV-Vis absorption spectrum of 4-MePh-KYNA.
- Fig. S5** a) Excitation (dashed line) and fluorescence (solid line) spectra and b) UV-Vis absorption spectrum of 2,6-diMePh-KYNA.
- Fig. S6** a) Excitation (dashed line) and fluorescence (solid line) spectra and b) UV-Vis absorption spectrum of 3,5-diMePh-KYNA.
- Fig. S7** a) Excitation (dashed line) and fluorescence (solid line) spectra and b) UV-Vis absorption spectrum of 2-MePh-D-KYN.

### **S. 3.2 pH-dependence of 2-MePh-KYNA fluorescence**

**Fig. S8** Fluorescence intensity of 2-MePh-KYNA (mean values in duplicate) at different pH environments.

### **S. 3.3 Determination of enzyme kinetic parameters using HPLC-UV**

**Fig. S9** Chromatogram after enzymatic reaction with D-amino acid oxidase (DAO) (50  $\mu$ U DAO + 2000  $\mu$ M 2-MePh-D-KYN, 37 °C, 1 h).

### **S. 3.4 Certification of enantio-purity of 2-MePh-D, L-KYN**

### **S. 3.5 Amino acid determination**

**Fig. S10** Eel plasma levels of D, L-Ser and D, L-Ala (mean values in duplicate).

## **S. 4 Supplementary Tables**

**Table S1** Tested solvents and their physical properties

**Table S2** Maximum excitation and emission wavelengths ( $\lambda_{\text{ex}}$  and  $\lambda_{\text{em}}$ ) and fluorescence intensity of 2-MePh-KYNA in each solvent

## **S. 5 References**

## S. 1 Chemicals for compound synthesis

Special-grade hexane, methanol (MeOH), 35% HCl, 99.5% ethanol (EtOH), 85% phosphoric acid (H<sub>3</sub>PO<sub>4</sub>), glacial acetic acid (AcOH), ethyl acetate (AcOEt), toluene, sodium bicarbonate (NaHCO<sub>3</sub>), sodium hydroxide (NaOH), potassium bicarbonate (K<sub>2</sub>CO<sub>3</sub>), potassium iodide (KI), potassium hydroxide (KOH), potassium dihydrogen phosphate (KH<sub>2</sub>PO<sub>4</sub>), diphenylether (Ph<sub>2</sub>O), 2-methylphenylboronic acid, 4-methylphenylboronic acid, 3,5-dimethylphenylboronic acid, diethyl acetylenedicarboxylate, cobalt(II) chloride hexahydrate (CoCl<sub>2</sub>·6H<sub>2</sub>O), D-aminoacylase “AMANO”, diethylamine, HPLC-grade formic acid, and first-grade anhydrous Na<sub>2</sub>SO<sub>4</sub> were purchased from FUJIFILM Wako Pure Chemical Corporation (Osaka, Japan).

Palladium(II) diacetate (Pd(OAc<sub>2</sub>)), 2-(dicyclohexylphosphino)-2'-(dimethylamino)biphenyl (DavePhos), phenylboronic acid, and 2,6-dimethylphenylboronic acid, chloroacetonitrile, anhydrous aluminum trichloride (AlCl<sub>3</sub>), boron trichloride in dichloromethane, sodium ethoxide (NaOEt), 1,8-diazabicyclo[5.4.0]undec-7-ene (DBU), and diethyl acetamidomalonate were purchased from Tokyo Chemical Industry (Tokyo, Japan). Dry dimethoxyethane (DME) was purchased from Kanto Kagaku (Tokyo, Japan). Acylase I from *Aspergillus melleus* was purchased from Sigma-Aldrich Co., Ltd. (St. Louis, CA, USA). Water was purified using

a Milli-Q Labo system (Nihon Millipore Co. Ltd., Tokyo, Japan).

## **S. 2 Synthesis and identification**

NMR spectra were recorded on a JMS-ECS 400 spectrometer (JEOL Ltd., Tokyo, Japan).

The chemical shift (ppm) was referenced using the residual solvent peak.<sup>1</sup> Mass spectra were recorded using a time-of-flight mass spectrometer (JMS-100LP “AccuTOF LC-plus”, JEOL Ltd.) equipped with an ESI ion source. Melting points (m.p.) were measured using a MEL-TEMP II<sup>®</sup> capillary melting point apparatus (Laboratory Devices, Holliston, MA, USA). Overviews of the compound synthesis are shown in **Schemes S1** and **S2**.

## S. 2.1 Phenyl-substituted kynurenic acid (KYNA) derivatives

**Scheme S1** Synthetic route for the phenyl-substituted KYNA fluorophores.

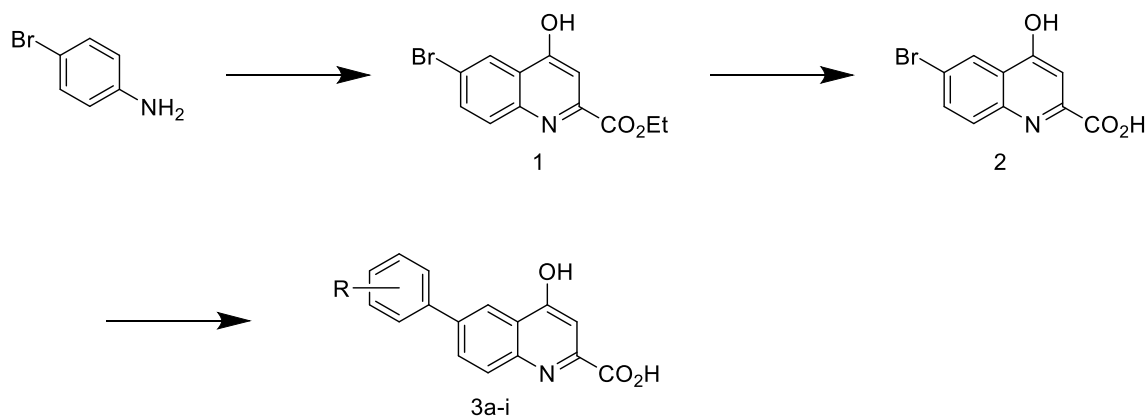

### Ethyl 6-bromokynurenate (1)

Diethyl acetylenedicarboxylate (40.1 mmol) was slowly added to a solution of 4-bromoaniline (39.7 mmol) dissolved in

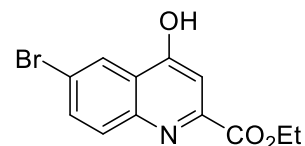

MeOH (100 mL). The mixture was stirred at 65 °C for 0.5 h. The solvent was then evaporated under reduced pressure. The residue was redissolved in Ph<sub>2</sub>O (100 mL) and heated at 250 °C for 1 h. The solution was cooled to room temperature (r.t., approximately 25 °C) and diluted with hexane (200 mL) to form a precipitate. The precipitate was filtered, washed with hexane, and recrystallised from EtOH to afford **1** as a grey crystalline solid (53% yield). *m/z* 295.99402 (calcd for [M+H] 295.99223); m.p. 246–251 °C; <sup>1</sup>H-NMR (400 MHz, DMSO-D<sub>6</sub>) δ 12.21 (s, 1H, OH), 8.14 (d, *J* = 2.1 Hz, 1H, ArH), 7.90–7.83 (m,

2H, *ArH*), 6.68 (s, 1H, *ArH*), 4.41 (q,  $J = 7.1$  Hz, 2H,  $\text{OCH}_2\text{CH}_3$ ), 1.35 (t,  $J = 7.1$  Hz, 3H,  $\text{OCH}_2\text{CH}_3$ );  $^{13}\text{C}$ -NMR (101 MHz, DMSO- $\text{D}_6$ )  $\delta$  176.3, 161.9, 138.9, 138.1, 135.3, 127.2, 126.8, 122.1, 116.9, 110.4, 62.7, 13.9.

### 6-Bromokynurenic acid (**2**, Br-KYNA):

Compound **1** (10.0 mmol) and KOH (45.0 mmol) were dissolved in 50%  $\text{H}_2\text{O}/\text{EtOH}$  (40 mL), and the mixture was

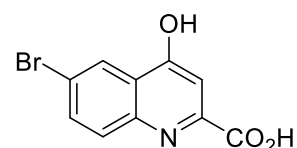

stirred at r.t. for 2 h. The solution was acidified with 2 M HCl to precipitate **2**. The precipitate was filtered, washed with  $\text{H}_2\text{O}$ , and dried under reduced pressure to furnish a pale orange solid (89% yield).  $m/z$  267.96456 (calcd for  $[\text{M}+\text{H}]$  267.96093); m.p. 283–286 °C;  $^1\text{H}$ -NMR (400 MHz, DMSO- $\text{D}_6$ )  $\delta$  12.16 (s, 1H, *OH*), 8.14 (d,  $J = 2.3$  Hz, 1H, *ArH*), 7.91 (d,  $J = 8.9$  Hz, 1H, *ArH*), 7.86–7.83 (m, 1H, *ArH*), 6.65 (s, 1H, *ArH*);  $^{13}\text{C}$ -NMR (101 MHz, 5% NaOD- $\text{D}_2\text{O}$ )  $\delta$  174.9, 172.8, 156.7, 147.4, 132.5, 129.4, 127.4, 125.4, 116.9, 107.1.

### 6-Phenylkynurenic acid (**3a**, Ph-KYNA):

Br-KYNA (1.02 mmol), phenylboronic acid (1.14 mmol), and  $\text{K}_2\text{CO}_3$  (2.05 mmol) were dissolved in  $\text{H}_2\text{O}$  (50 mL). A

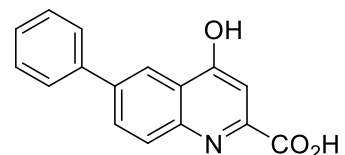

catalytic amount (~5 mg) of  $\text{Pd}(\text{OAc})_2$  was added to the solution followed by stirring for 3 h. The solution was diluted with 1 M HCl. The precipitate was filtered, washed with

H<sub>2</sub>O, and dried under reduced pressure to afford a white solid (96% yield). *m/z* 266.07989 (calcd for [M+H] 266.08172); m.p. 271–273 °C; <sup>1</sup>H-NMR (400 MHz, 5% NaOD-D<sub>2</sub>O) δ 7.98 (s, 1H, ArH), 7.48 (s, 2H, ArH), 7.32 (d, J = 7.3 Hz, 2H, ArH), 7.07 (t, J = 7.7 Hz, 2H, ArH), 6.97 (t, J = 7.3 Hz, 1H, ArH), 6.53 (s, 1H, ArH); <sup>13</sup>C-NMR (101 MHz, 5% NaOD-D<sub>2</sub>O) δ 175.0, 174.0, 156.4, 148.2, 140.0, 135.5, 129.1, 128.6, 128.1, 127.5, 126.8, 126.3, 120.7, 106.9.

**6-(2-Methylphenyl)kynurenic acid (3b, 2-MePh-KYNA):**

Br-KYNA (2.00 mmol), 2-methylphenylboronic acid (2.19 mmol), and K<sub>2</sub>CO<sub>3</sub> (10.6 mmol) were dissolved in H<sub>2</sub>O (50

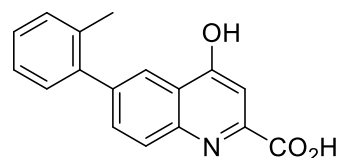

mL). Pd(OAc)<sub>2</sub> (10.3 μmol) was added to this solution, which was then refluxed for 1 h. The solution was diluted with 1 M HCl. The precipitate was filtered, washed with H<sub>2</sub>O, and dried under reduced pressure to afford a white solid (85% yield). *m/z* 280.09846 (calcd for [M+H] 280.09737); m.p. 255–259 °C; <sup>1</sup>H-NMR (400 MHz, DMSO-D<sub>6</sub>) δ 12.06 (s, 1H, OH), 8.01 (d, J = 8.7 Hz, 1H, ArH), 7.96 (d, J = 2.1 Hz, 1H, ArH), 7.71 (dd, J = 8.7, 2.3 Hz, 1H, ArH), 7.32–7.23 (m, 4H, ArH), 6.66 (s, 1H, ArH), 2.23 (s, 3H, CH<sub>3</sub>); <sup>13</sup>C-NMR (101 MHz, DMSO-D<sub>6</sub>) δ 177.6, 163.8, 140.4, 139.8, 139.0, 136.8, 134.8, 133.5, 130.5, 129.7, 127.6, 126.1, 125.6, 124.3, 119.6, 109.8, 20.2.



**6-(4-Methylphenyl)kynurenic acid (3c, 4-MePh-KYNA):**

Br-KYNA (1.00 mmol), 4-methylphenylboronic acid (1.32 mmol), and K<sub>2</sub>CO<sub>3</sub> (2.34 mmol) were dissolved in

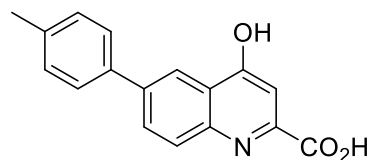

H<sub>2</sub>O (50 mL). A catalytic amount (~5 mg) of Pd(OAc)<sub>2</sub> was added to this solution, which was then stirred for 1 h. The solution was diluted with 1 M HCl. The precipitate was filtered, washed with H<sub>2</sub>O, and dried under reduced pressure to furnish a white solid (quant.). *m/z* 280.09906 (calcd for [M+H] 280.09737); m.p. 274–278 °C; <sup>1</sup>H-NMR (400 MHz, DMSO-D<sub>6</sub>) δ 12.03 (s, 1H, OH), 8.24 (t, J = 1.1 Hz, 1H, ArH), 7.99 (s, 2H, ArH), 7.61 (d, J = 8.2 Hz, 2H, ArH), 7.27 (d, J = 8.2 Hz, 2H, ArH), 6.62 (s, 1H, ArH), 2.32 (s, 3H, CH<sub>3</sub>); <sup>13</sup>C-NMR (101 MHz, 10% METHANOL-D<sub>4</sub>/PYRIDINE-D<sub>5</sub>) δ 179.8, 165.5, 148.9, 142.1, 139.9, 137.4, 131.4, 130.0, 127.0, 127.0, 124.0, 123.1, 120.0, 110.7, 20.7.

**6-(2,6-Dimethylphenyl)kynurenic acid (3d, 2,6-diMePh-KYNA):**

Br-KYNA (2.11 mmol), 2,6-dimethylphenylboronic acid (2.25 mmol), and K<sub>2</sub>CO<sub>3</sub> (10.4 mmol) were dissolved in 50%

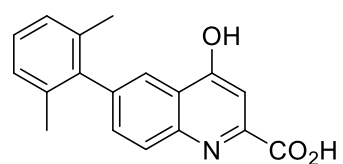

H<sub>2</sub>O/DME (20 mL). Pd(OAc)<sub>2</sub> (0.243 mmol) and DavePhos

(0.166 mmol) were added to the solution, which was then refluxed under an argon atmosphere for 40 h. The product was purified by reversed-phase chromatography (ODS, 50% MeOH/0.1 M phosphate buffer, pH 7.5). The target fraction was concentrated and

acidified with HCl to precipitate **3d**. The precipitate was filtered, washed with H<sub>2</sub>O, and dried under reduced pressure to afford a white solid (62% yield). *m/z* 294.11436 (calcd for [M+H] 294.11302); m.p. 257–260 °C; <sup>1</sup>H-NMR (400 MHz, DMSO-D<sub>6</sub>) δ 12.06 (s, 1H, OH), 8.04 (d, J = 8.5 Hz, 1H, ArH), 7.78 (d, J = 2.1 Hz, 1H, ArH), 7.49 (dd, J = 8.5, 2.1 Hz, 1H, ArH), 7.18–7.10 (m, 3H, ArH), 6.68 (s, 1H, ArH), 1.94 (s, 6H, CH<sub>3</sub>); <sup>13</sup>C-NMR (101 MHz, DMSO-D<sub>6</sub>) δ 177.5, 163.8, 140.4, 139.2, 139.0, 136.1, 135.4, 133.7, 127.4, 127.3, 125.8, 124.3, 120.2, 109.9, 20.6.

**6-(3,5-Dimethylphenyl)kynurenic acid (3e, 3,5-diMePh-KYNA):**

Br-KYNA (0.996 mmol), 3,5-dimethylphenylboronic acid (1.04 mmol), and K<sub>2</sub>CO<sub>3</sub> (2.76 mmol) were dissolved in H<sub>2</sub>O (50 mL). A catalytic amount (~5 mg) of Pd(OAc)<sub>2</sub> was

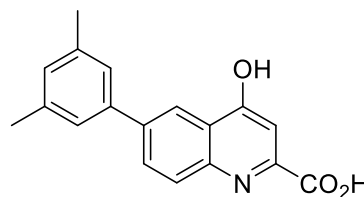

added to the solution, which was refluxed for 1 h. The solution was diluted with 1 M HCl. The precipitate was filtered, washed with H<sub>2</sub>O, and dried under reduced pressure to afford a pale-yellow solid (89% yield). *m/z* 294.11384 (calcd for [M+H] 294.11302); m.p. 273–275 °C; <sup>1</sup>H-NMR (400 MHz, DMSO-D<sub>6</sub>) δ 12.06 (s, 1H, OH), 8.27 (t, J = 1.4 Hz, 1H, ArH), 8.01 (d, J = 1.4 Hz, 2H, ArH), 7.33 (s, 2H, ArH), 7.01 (s, 1H, ArH), 6.65 (s, 1H, ArH), 2.35 (s, 6H, CH<sub>3</sub>); <sup>13</sup>C-NMR (101 MHz, 10% METHAOL-D<sub>4</sub>/PYRIDINE-D<sub>5</sub>) δ 167.8, 153.1, 130.8, 127.6, 127.4, 126.2, 124.6, 119.3, 117.0, 114.2, 112.6, 110.8, 107.5,

97.8, 8.6.

## S. 2.2 2-MePh-D,L-kynurenine (KYN)

**Scheme S2** Synthetic route for 2-MePh-D-KYN and 2-MePh-L-KYN.

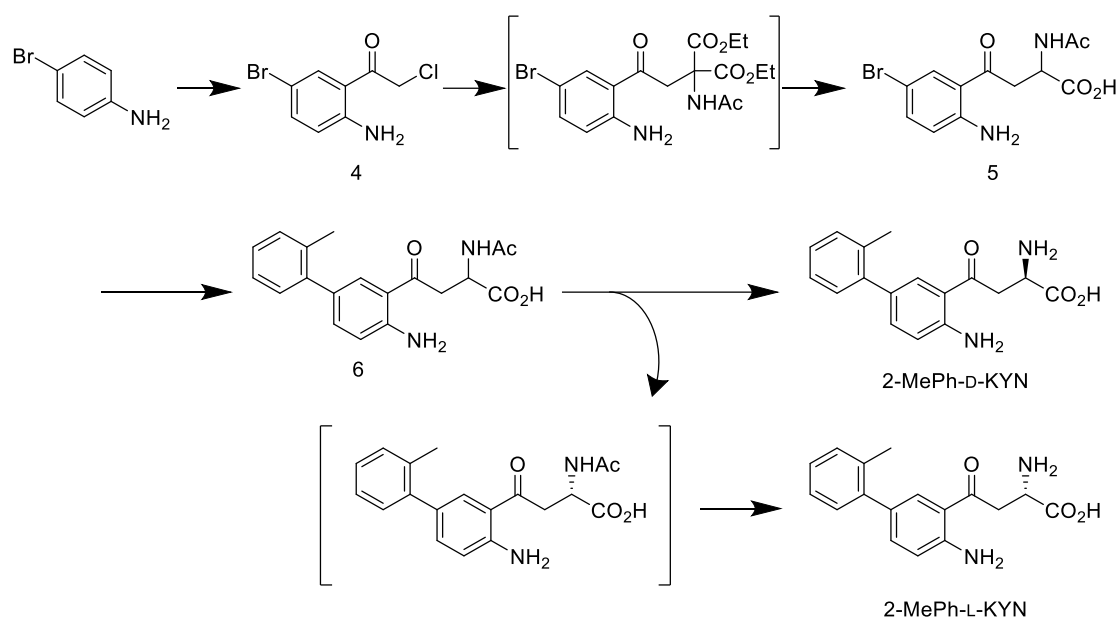

### 1-(2-Amino-5-bromophenyl)-2-chloroethan-1-one (4):

Boron trichloride (*ca.* 1 M, in dichloromethane, 72 mL),  $\text{AlCl}_3$  (75.1 mmol), and chloroacetonitrile (5 mL) were added to a

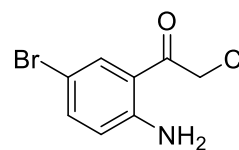

solution of 4-bromoaniline (66.3 mmol) in toluene (72 mL) at r.t. The mixture was refluxed under an argon atmosphere for 16 h. Then, 0.5 M HCl (100 mL) was added to quench the reaction, and the solution was cooled to r.t. The target compound was extracted in  $\text{CHCl}_3$  (200 mL  $\times$  3). The organic layer was then dried ( $\text{Na}_2\text{SO}_4$ ), filtered, and

evaporated to dryness. Toluene (50 mL) and hexane (200 mL) were added to solidify the residue. The supernatant was discarded and the residue was dried under reduced pressure to afford **4** as a brown solid (14% yield).  $m/z$  247.95136 (calcd for  $[M+H]$  247.94778); m.p. 129–132 °C;  $^1\text{H-NMR}$  (400 MHz, CHLOROFORM-D)  $\delta$  7.72 (d,  $J = 2.3$  Hz, 1H, *ArH*), 7.36 (dd,  $J = 8.8, 2.2$  Hz, 1H, *ArH*), 6.60 (d,  $J = 8.9$  Hz, 1H, *ArH*), 6.35 (s, 2H,  $\text{NH}_2$ ), 4.64 (s, 2H,  $\text{CH}_2$ );  $^{13}\text{C-NMR}$  (101 MHz, CHLOROFORM-D)  $\delta$  191.6, 149.9, 137.9, 132.7, 119.3, 116.2, 106.8, 46.3.

**2-Acetamido-4-(2-amino-5-bromophenyl)-4-oxobutanoic acid (5):**

Compound **4** (37.1 mmol), diethyl acetamidomalonate (38.0 mmol), NaOEt (77.6 mmol), NaI (3.96 mmol), and DBU (3 mL) were dissolved in EtOH (100 mL). The solution was refluxed for 3 h and transferred to a separating funnel. Saturated  $\text{NaHCO}_3$  (100 mL) was then added and the product was extracted with  $\text{CHCl}_3$  (100 mL $\times$ 3). The organic layer was dried with  $\text{Na}_2\text{SO}_4$ , and the solvent was evaporated under reduced pressure. The residue was partially purified by chromatography (silica gel, 50% AcOEt/hexanes) to afford a crude  $\alpha$ -substituted diethyl acetamidomalonate intermediate. The intermediate and NaOH (103 mmol) were dissolved in  $\text{H}_2\text{O}$  (100 mL). The mixture was refluxed for 30 min, AcOH (10 mL) was added to it, and the resultant mixture was refluxed for 1.5 h. The mixture was transferred

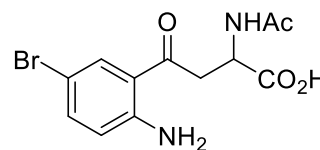

to a separating funnel and extracted with AcOEt (100 mL×4). The organic layer was dried with Na<sub>2</sub>SO<sub>4</sub>, and the solvent was evaporated under reduced pressure. The residue was partially purified using chromatography (ODS, AcOH/H<sub>2</sub>O/MeOH [0.1:50:50]) and recrystallised in H<sub>2</sub>O to furnish compound **5** (9.5% yield). *m/z* 329.01680 (calcd for [M+H] 329.01369); m.p. 177–180 °C; <sup>1</sup>H-NMR (400 MHz, DMSO-D<sub>6</sub>) δ 12.59 (s, 1H, CO<sub>2</sub>H), 8.11 (d, *J* = 8.0 Hz, 1H, ArH), 7.84 (d, *J* = 2.3 Hz, 1H, ArH), 7.36 (dd, *J* = 8.9, 2.3 Hz, 1H, ArH), 7.32 (s, 2H, NH<sub>2</sub>), 6.75 (d, *J* = 8.9 Hz, 1H, NHAc), 4.70–4.65 (m, 1H, α-CH<sub>2</sub>), 3.35–3.33 (m, 2H, β-CH<sub>2</sub>), 1.81 (s, 3H, Ac); <sup>13</sup>C-NMR (101 MHz, DMSO-D<sub>6</sub>) δ 197.5, 173.1, 169.1, 150.2, 136.8, 132.9, 119.4, 117.5, 104.6, 48.0, 40.3, 22.4.

**2-Acetamido-4-(4-amino-2'-methyl-[1,1'-biphenyl]-3-yl)-4-oxobutanoic acid (6):**

Compound **5** (2.09 mmol), 2-methylphenylboronic acid (2.24 mmol), and K<sub>2</sub>CO<sub>3</sub> (4.20 mmol) were dissolved in

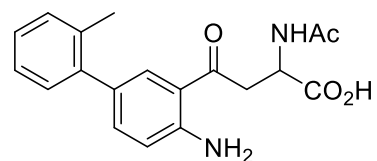

50% H<sub>2</sub>O/MeOH (20 mL). A catalytic amount (~5 mg) of Pd(OAc)<sub>2</sub> was added to the solution. The mixture was stirred at r.t. for 1 h and refluxed for another 2 h. The remaining solution was acidified with HCl and passed through an ODS chromatography column (50% H<sub>2</sub>O/MeOH as mobile phase). The target fraction was concentrated to afford **6** as a white solid (59% yield). *m/z* 341.14693 (calcd for [M+H] 341.15013); m.p. 177–180 °C; <sup>1</sup>H-NMR (400 MHz, DMSO-D<sub>6</sub>) δ 12.55 (s, 1H, CO<sub>2</sub>H), 8.10 (d, *J* = 7.8 Hz, 1H, AcNH),

7.64 (d,  $J = 2.1$  Hz, 1H, ArH), 7.29–7.24 (m, 4H, ArH), 7.23–7.21 (m, 2H, NH<sub>2</sub>), 7.21–7.18 (m, 1H, ArH), 6.84 (d,  $J = 8.7$  Hz, 1H, NHAc), 4.74–4.69 (m, 1H,  $\alpha$ -CH), 3.43–3.33 (m, 2H,  $\beta$ -CH<sub>2</sub>), 2.26 (s, 3H, PhCH<sub>3</sub>), 1.81 (s, 3H, Ac); <sup>13</sup>C-NMR (101 MHz, DMSO-D<sub>6</sub>)  $\delta$  198.3, 173.2, 169.1, 150.1, 140.8, 135.2, 134.8, 131.2, 130.3, 129.5, 127.3, 126.8, 126.0, 116.9, 115.9, 48.0, 40.3, 22.4, 20.4.

**5-(2-Methylphenyl)-D, L-kynurenine (2-MePh-D, L-KYN):**

Compound **6** (1.11 mmol), D-aminoacylase (105 mg), and CoCl<sub>2</sub> · 6H<sub>2</sub>O (12.7 mg) were dissolved in 50 mL

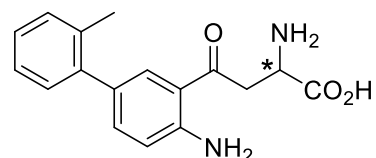

phosphate buffer (0.1 M, pH 8.4). The solution was stirred at 37 °C for 185 h. The product was separated via chromatography (ODS, AcOH/H<sub>2</sub>O/MeOH, 0.1:50:50), where fractions containing 2-MePh-D-KYN and the L-isomer of **6** were obtained. 2-MePh-D-KYN was concentrated and recrystallised with water to furnish pure 2-MePh-D-KYN as a pale-yellow solid (45% yield). The L-isomer of **6** was concentrated to dryness and dissolved in 50 mL phosphate buffer (0.1 M, pH 8.4). Acylase I (101 mg) and CoCl<sub>2</sub> · 6H<sub>2</sub>O (12.1 mg) were added to it, and it was stirred at 45 °C for 18 h. The resultant 2-MePh-L-KYN was purified in the same manner as the D-form (51% yield). [**2-MePh-D-KYN**]  $m/z$  299.13497 (calcd for [M+H] 299.13957); m.p. 214–216 °C; <sup>1</sup>H-NMR (400 MHz, DMSO-D<sub>6</sub>)  $\delta$  7.60 (d,  $J = 2.1$  Hz, 1H, ArH), 7.28–7.19 (m, 7H, ArH and NH<sub>2</sub>),

6.84 (d,  $J = 8.7$  Hz, 1H, ArH), 3.63 (dd,  $J = 8.6, 3.5$  Hz, 1H,  $\alpha$ -CH), 3.52 (dd,  $J = 17.9, 3.7$  Hz, 1H,  $\beta$ -CH<sub>2</sub>), 3.29 (dd,  $J = 17.9, 8.5$  Hz, 1H,  $\beta$ -CH<sub>2</sub>), 2.25 (s, 3H, CH<sub>3</sub>); <sup>13</sup>C-NMR (101 MHz, DMSO-D6)  $\delta$  199.3, 169.2, 150.0, 140.7, 135.1, 134.8, 131.0, 130.3, 129.4, 127.3, 126.7, 126.0, 116.8, 116.1, 49.9, 20.3; [**2-MePh-L-KYN**]  $m/z$  299.14318 (calcd for [M+H] 299.13957); m.p. 214–215 °C; <sup>1</sup>H-NMR (400 MHz, DMSO-D6)  $\delta$  7.60 (d,  $J = 2.1$  Hz, 1H, ArH), 7.29–7.17 (m, 7H, ArH and NH<sub>2</sub>), 6.84 (d,  $J = 8.5$  Hz, 1H, ArH), 3.61 (dd,  $J = 8.6, 3.5$  Hz, 1H,  $\alpha$ -CH), 3.52 (dd,  $J = 17.7, 3.5$  Hz, 1H,  $\beta$ -CH<sub>2</sub>), 3.27 (q,  $J = 8.8$  Hz, 1H,  $\beta$ -CH<sub>2</sub>), 2.25 (s, 3H, CH<sub>3</sub>); <sup>13</sup>C-NMR (101 MHz, DMSO-D6)  $\delta$  199.4, 169.1, 150.0, 140.7, 135.1, 134.8, 131.0, 130.3, 129.4, 127.3, 126.7, 126.0, 116.8, 116.1, 49.9, 20.3.

### S. 3 Supplementary experiments and results

#### S. 3.1 Excitation, fluorescence, and UV-Vis absorption spectra

The samples were prepared by dissolving KYNA derivatives in PBS solution at 10  $\mu$ M.

Excitation and fluorescence spectra were plotted with dashed and solid lines, respectively.

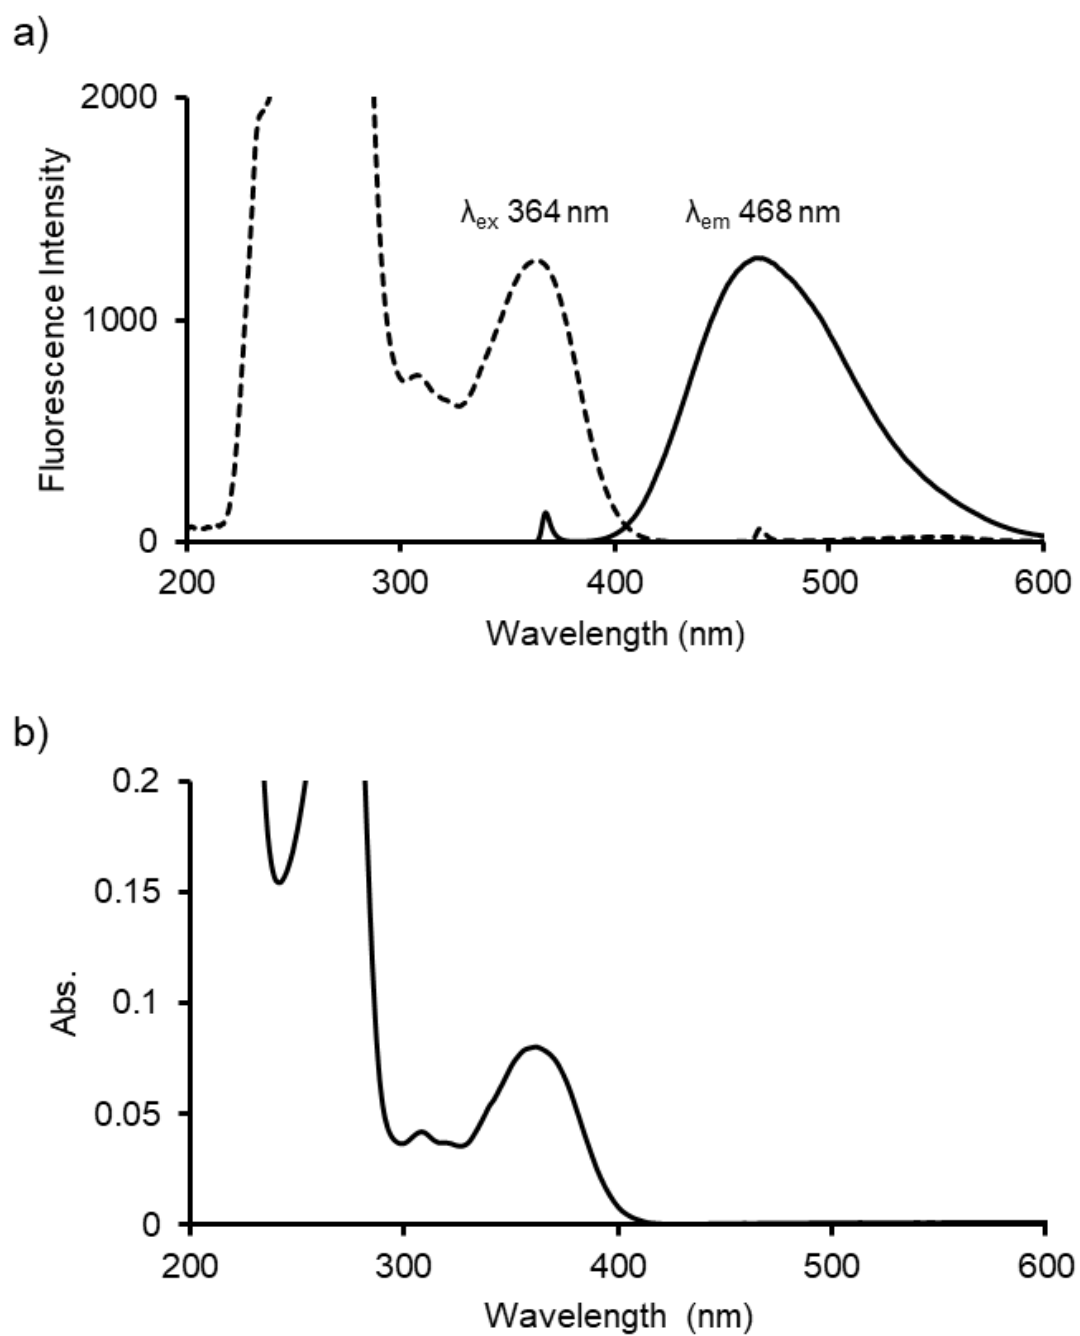

**Fig. S1** a) Excitation (dashed line) and fluorescence (solid line) spectra and b) UV-Vis absorption spectrum of MeS-KYNA.



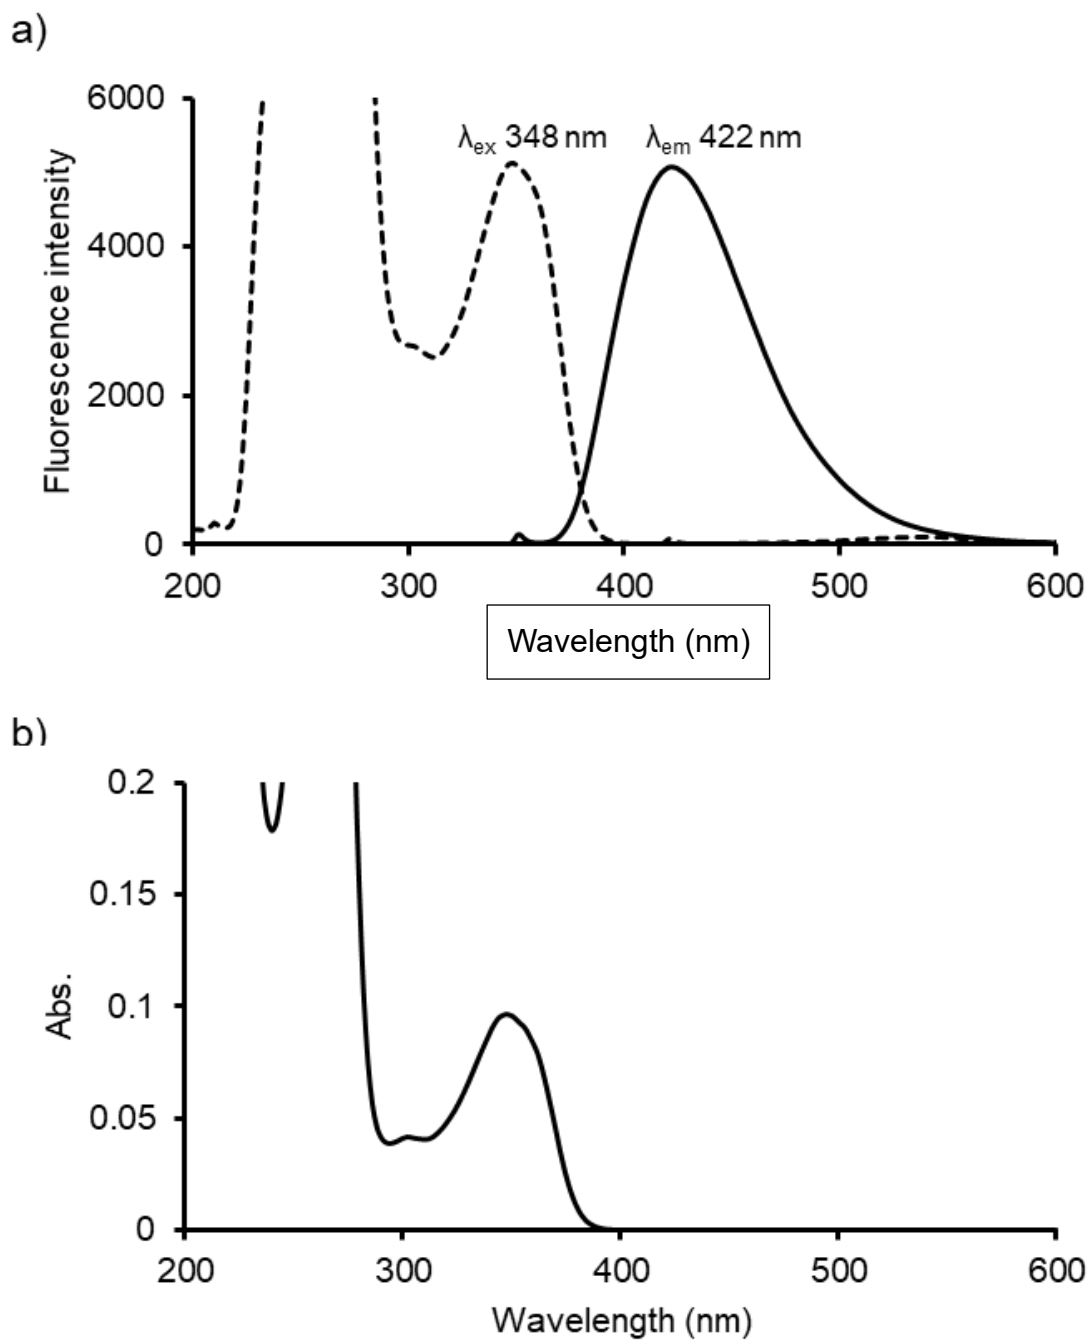

**Fig. S2** a) Excitation (dashed line) and fluorescence (solid line) spectra and b) UV-Vis absorption spectrum of Ph-KYNA.

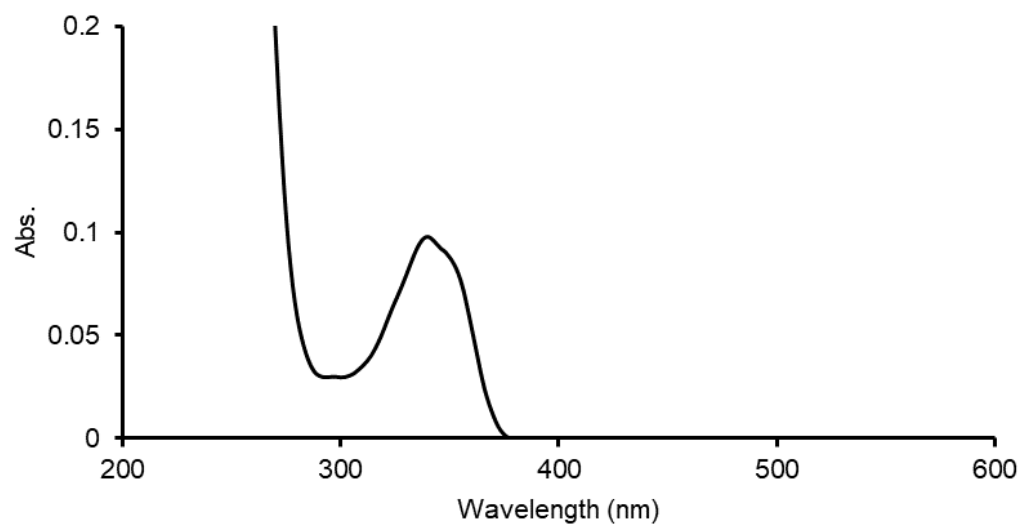

**Fig. S3** UV-Vis absorption spectrum of 2-MePh-KYNA. The excitation and fluorescence spectra are shown in Fig. 3 in the main text.

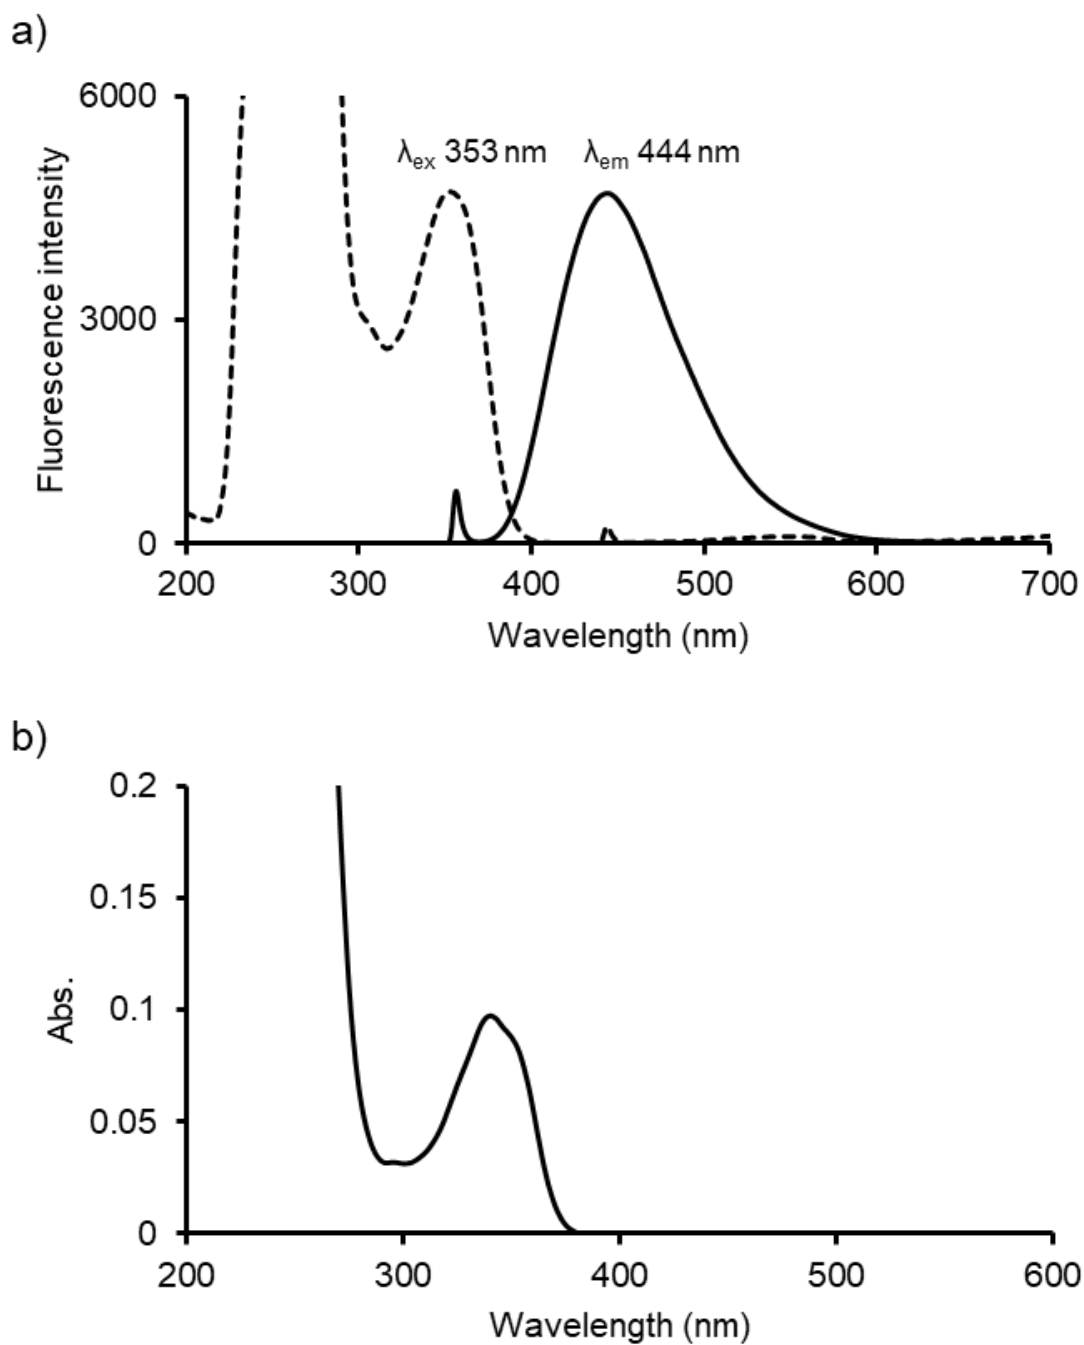

**Fig. S4** a) Excitation (dashed line) and fluorescence (solid line) spectra and b) UV-Vis absorption spectrum of 4-MePh-KYNA.

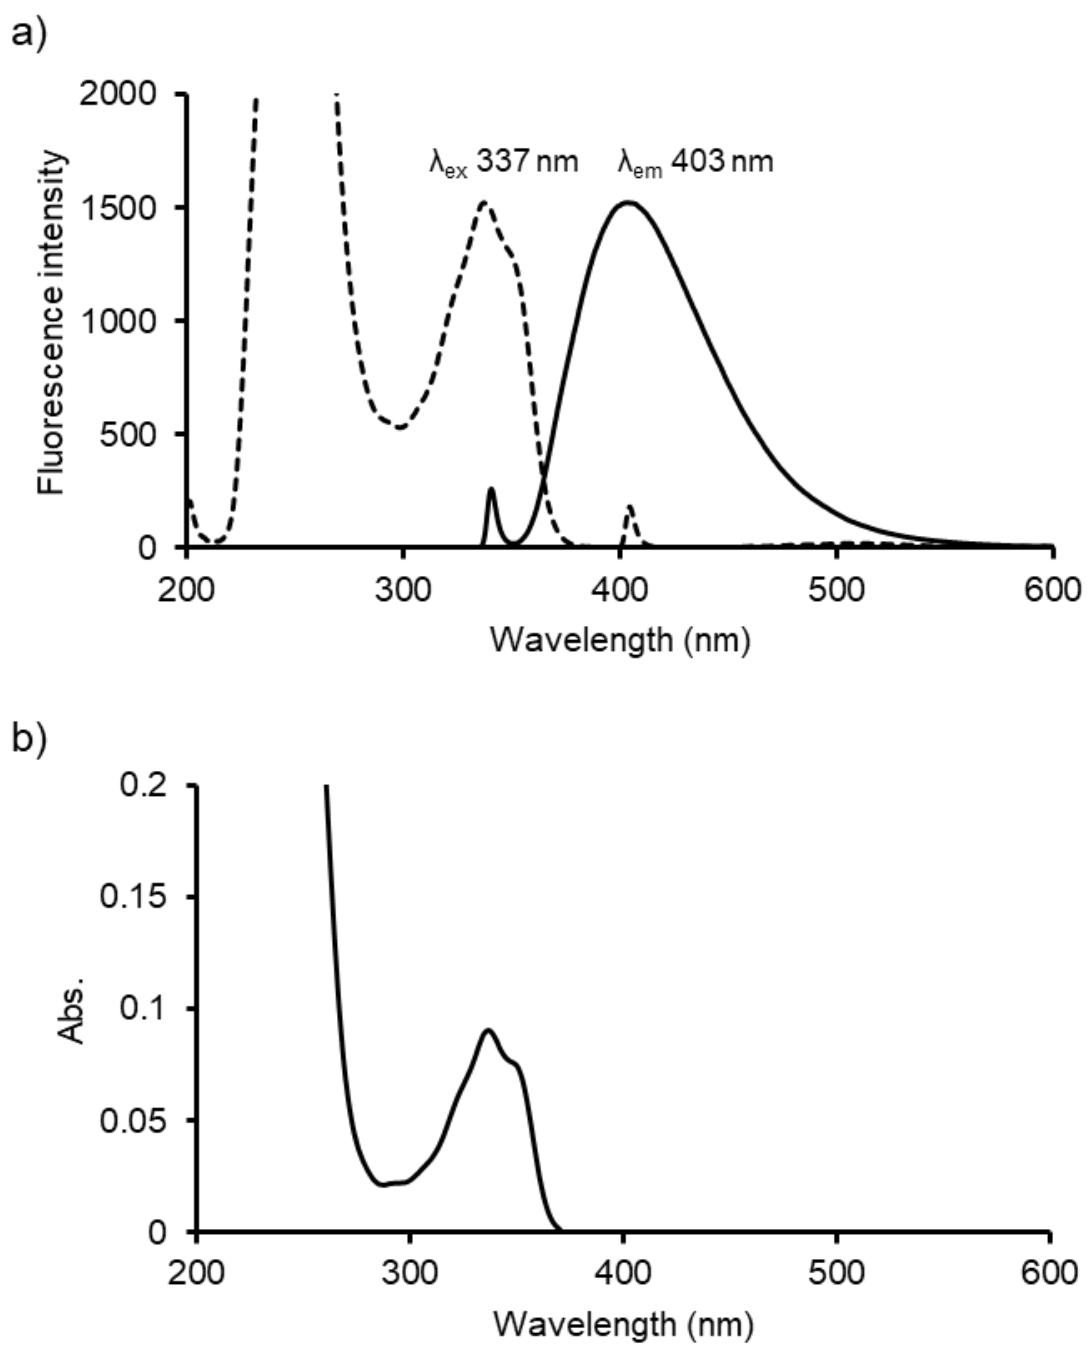

**Fig. S5** a) Excitation (dashed line) and fluorescence (solid line) spectra and b) UV-Vis absorption spectrum of 2,6-diMePh-KYNA.

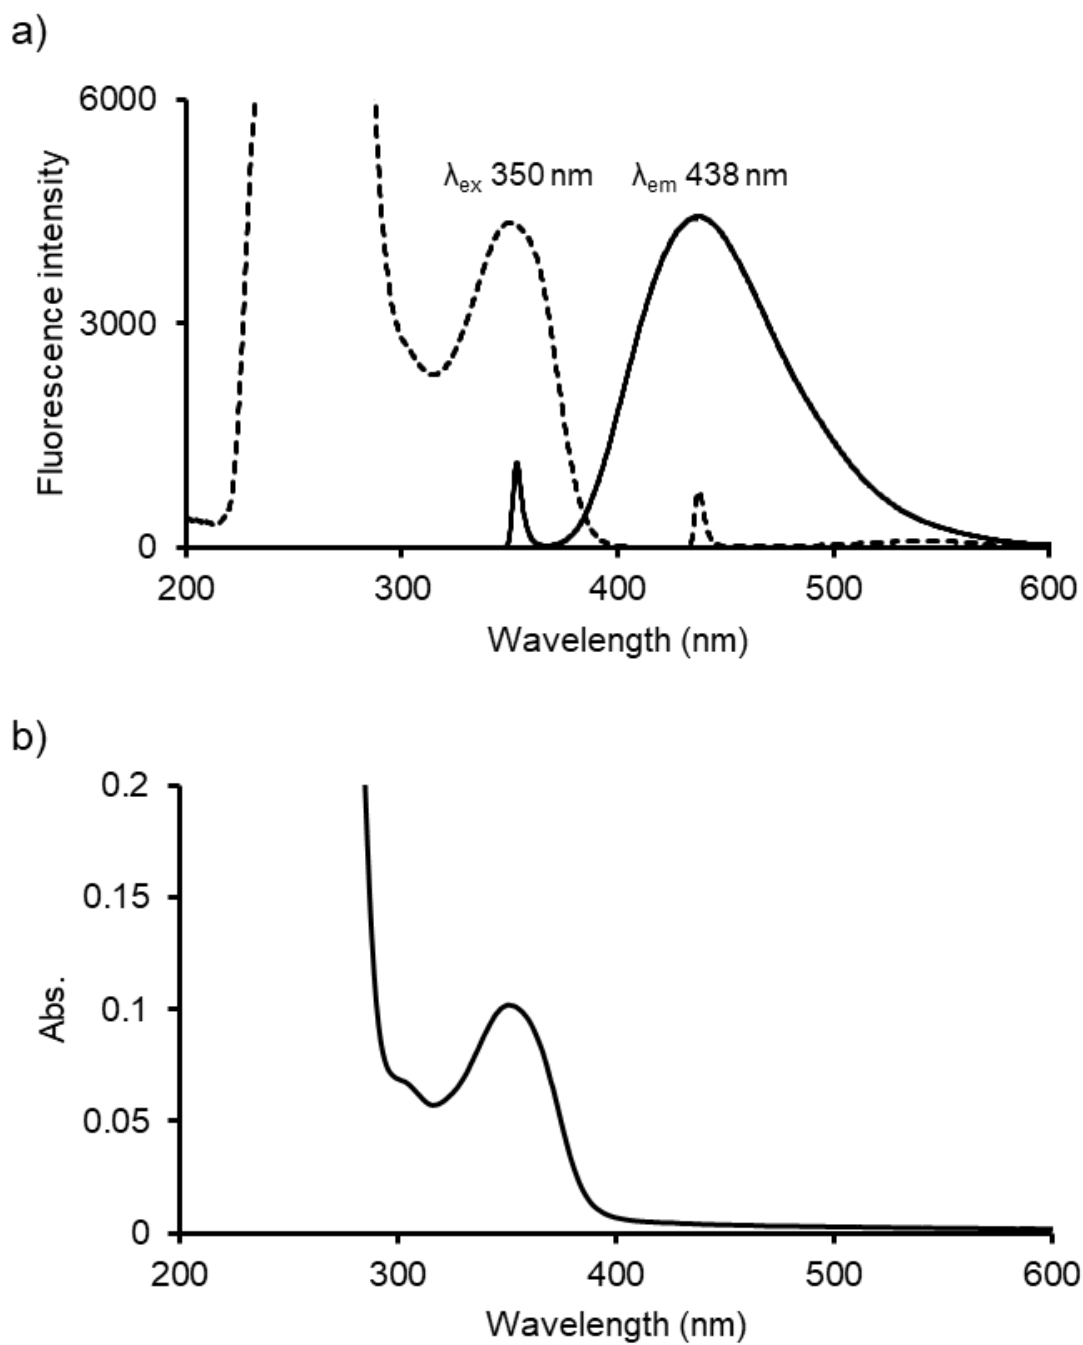

**Fig. S6** a) Excitation (dashed line) and fluorescence (solid line) spectra and b) UV-Vis absorption spectrum of 3,5-diMePh-KYNA.

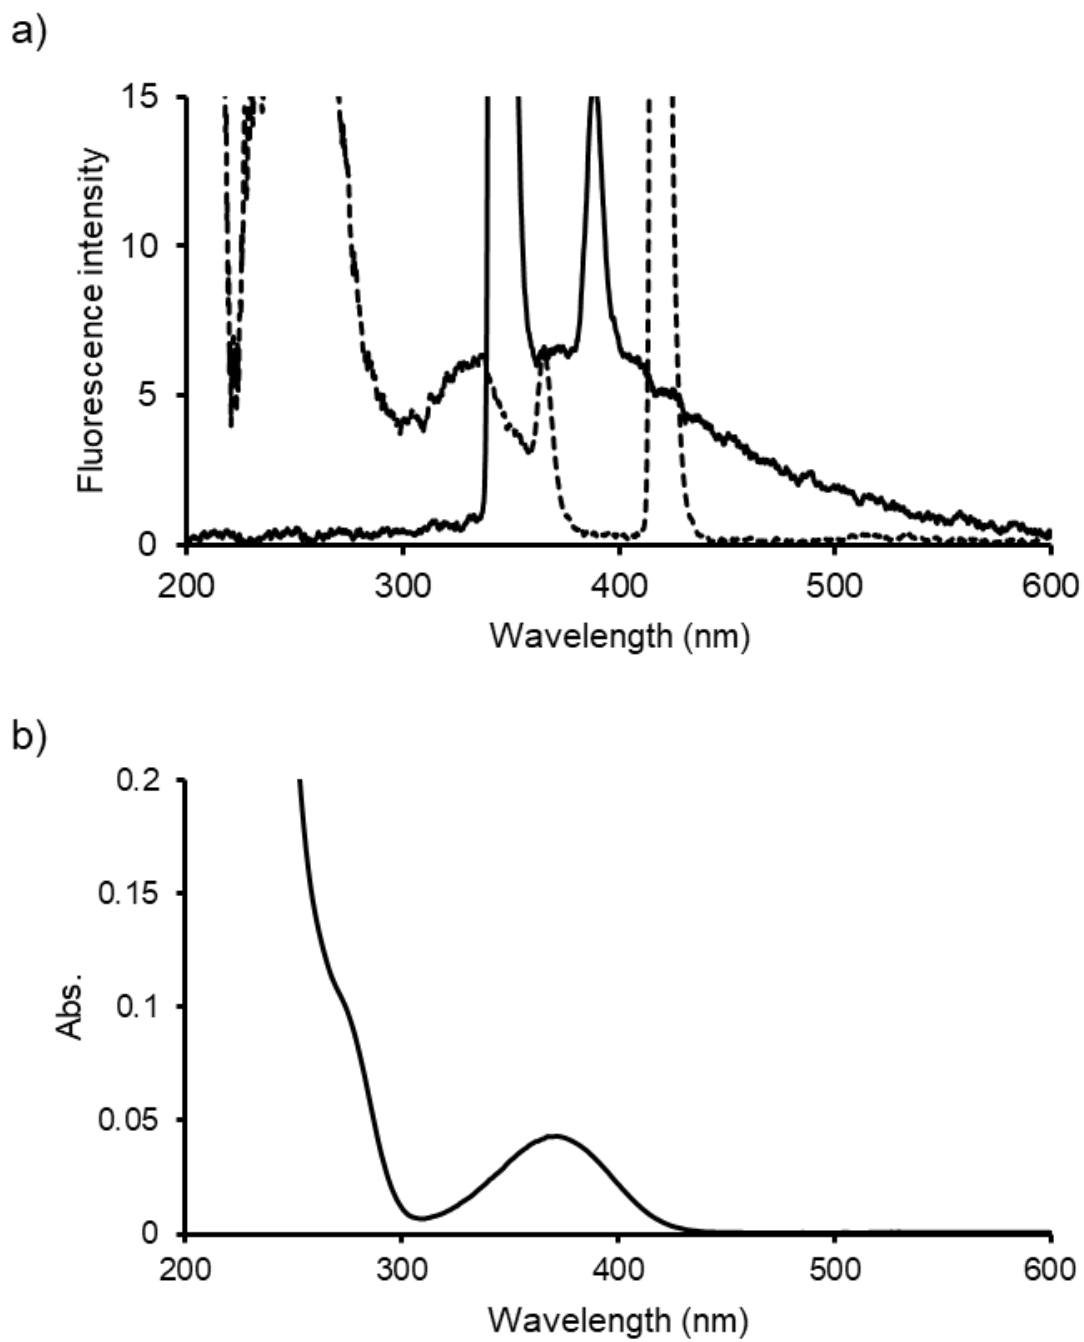

**Fig. S7** a) Excitation (dashed line) and fluorescence (solid line) spectra and b) UV-Vis absorption spectrum of 2-MePh-D-KYN.

### S. 3.2 pH-dependence of 2-MePh-KYNA fluorescence

To test the pH-dependence of fluorescence, 10  $\mu$ L of each 2-MePh-KYNA solution (in DMSO, 10 mM) was diluted to 10  $\mu$ M using a 40 mM Britton-Robinson buffer (pH was adjusted at 2, 3, 4, 5, 6, 7, 8, 9, 10, 11, and 12). The fluorescence intensities (ex. 340 and em. 418 nm) were recorded at different pH values using an F-7000 spectrofluorometer.

As shown in Fig. S8, a decrease in fluorescence was observed at pH 4–5 and 10–11. The fluorescence intensity was maintained at its maximum at a pH range of 5–10, including the physiological pH (around 7).

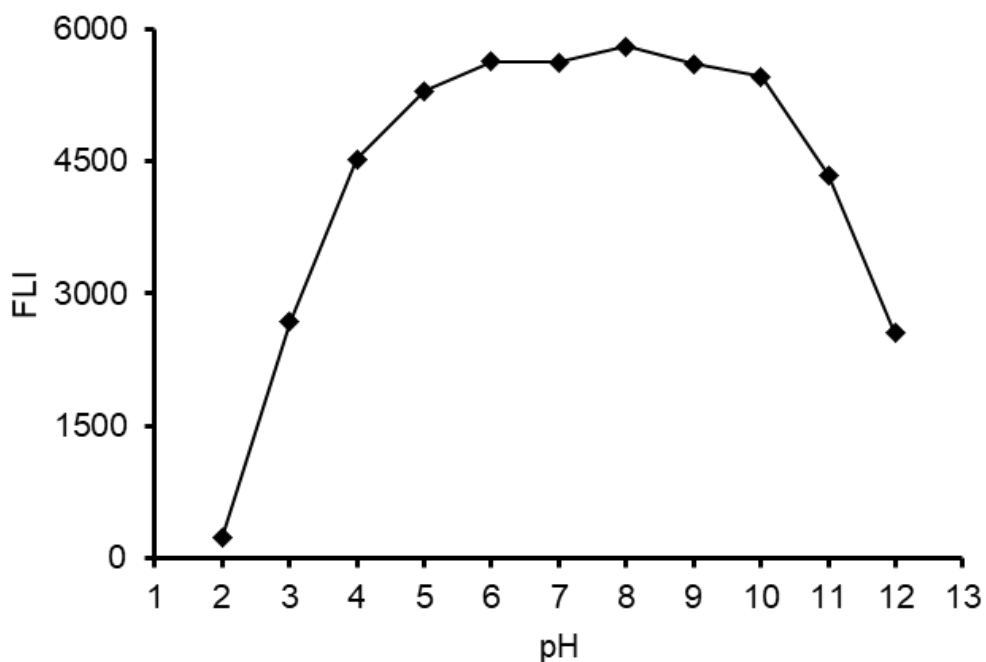

**Fig. S8** Fluorescence intensity of 2-MePh-KYNA (mean values in duplicate) at different pH values.

### S. 3.3 Determination of enzyme kinetic parameters using HPLC-UV

A HPLC-UV system was used equipped with two LC-10ADVP pumps, a CTO-10ASVP column oven, an SPD-20A UV-vis detector (Shimadzu Corp., Kyoto, Japan), a GL-7420 autosampler (GL Sciences Inc., Tokyo, Japan), and a Cadenza CD-C18 (4.6×150 mm, 3 μm) separation column (Imtakt Corp., Kyoto, Japan).

The mobile phases A and B were 0.05% H<sub>3</sub>PO<sub>4</sub> and CH<sub>3</sub>CN, respectively. The mobile phase gradient was as follows: B: 3% (0–2 min), 3–100% (2–15 min), 100% (15–20 min), and initialization for the next analysis (20–30 min).

The flow rate, column temperature, injection volume, and detection wavelength were 1.0 mL/min, 40 °C, 1.0 μL, and 254 nm, respectively.

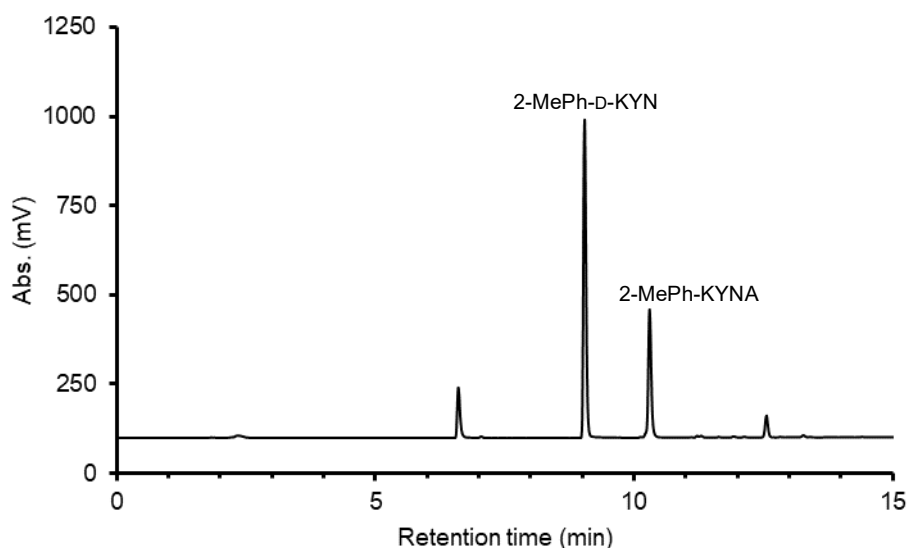

**Fig. S9** Chromatogram after the enzymatic reaction with DAO (50 μU DAO + 2000 μM 2-MePh-D-KYN, 37 °C, 1 h).



### **S. 3.4 Certification of the enantiopurity of 2-MePh-D, L-KYN**

An HPLC equipped with a chiral column was used to certify the enantiopurity of 2-MePh-D-KYN and 2-MePh-L-KYN. The following equipment and settings were used: Pump: PU-4180 (JASCO Corp.); column oven: CO-2065PLUS (JASCO Corp.); detector: L-400H (Hitachi High-Tech Corp., Tokyo, Japan); autosampler: AS-4050i (JASCO Corp.); column: CHIRALPAK® ZWIX (+) (4 × 250 mm, 3 μm); column temperature: Room temperature; injection volume: 10 μL; detection: UV 254 nm; flow rate: 0.5 mL/min; mobile phase: 40 mM formic acid and 20 mM diethylamine in [MeOH/H<sub>2</sub>O (4/1)].

### **S. 3.5 Amino acid determination**

The amino acid levels in the eel plasma were determined using LC-MS/MS after diastereomeric derivatisation using (*R*)-CIMA-OSu according to a previously reported method.<sup>2,3</sup> The samples for analysis were prepared based on a previously reported method.<sup>3</sup>

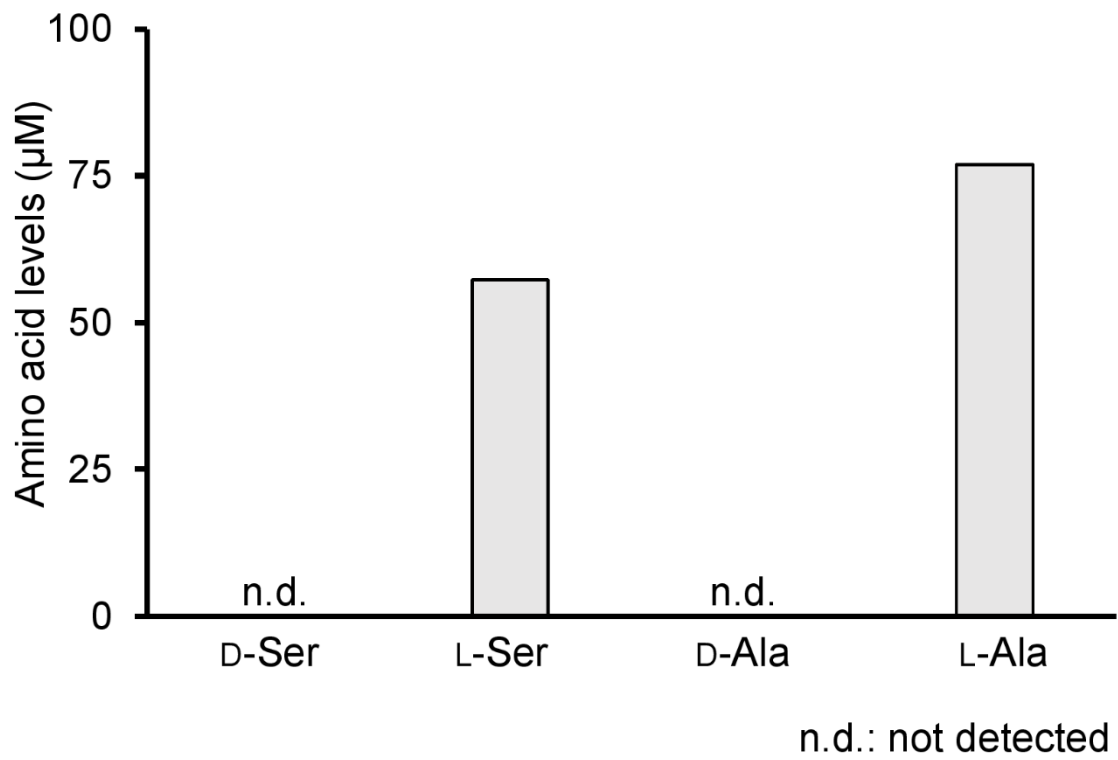

**Fig. S10** Eel plasma levels of D, L-Ser and D, L-Ala (mean values in duplicate).

## S. 4 Supplementary Tables

**Table S1** Tested solvents and their physical properties

| Solvents                   | Abbreviation       | Viscosity<br>(mPa·s) | Dielectric<br>constant | p <i>K</i> <sub>a</sub> | Protic/Aprotic |
|----------------------------|--------------------|----------------------|------------------------|-------------------------|----------------|
| methanol                   | MeOH               | 0.54 <sup>4</sup>    | 33 <sup>5</sup>        | 15.54 <sup>6</sup>      | protic         |
| ethanol                    | EtOH               | 1.08 <sup>4</sup>    | 24 <sup>5</sup>        | 16 <sup>6</sup>         | protic         |
| ethylene glycol            | EG                 | 16.1 <sup>6</sup>    | 37.7 <sup>5</sup>      | 14.77 <sup>6</sup>      | protic         |
| glycerine                  | Glyc               | 934 <sup>7</sup>     | 42.5 <sup>5</sup>      | 14.4 <sup>8</sup>       | protic         |
| ethyl acetate              | AcOEt              | 0.4 <sup>9</sup>     | 6 <sup>5</sup>         | -                       | aprotic        |
| tetrahydrofuran            | THF                | 0.44 <sup>9</sup>    | 7.5 <sup>5</sup>       | -                       | aprotic        |
| 2-propanol                 | IPA                | 2.04 <sup>4</sup>    | 19 <sup>5</sup>        | 16.5 <sup>10</sup>      | protic         |
| dimethyl<br>sulfoxide      | DMSO               | 1.99 <sup>7</sup>    | 46.7 <sup>5</sup>      | -                       | aprotic        |
| water                      | H <sub>2</sub> O   | 0.89 <sup>7</sup>    | 80.1 <sup>5</sup>      | 14 <sup>10</sup>        | protic         |
| acetonitrile               | CH <sub>3</sub> CN | 0.34 <sup>5</sup>    | 37.5 <sup>5</sup>      | -                       | aprotic        |
| 2,2,2-<br>trifluoroethanol | TFE                | 1.73 <sup>11</sup>   | 8.55 <sup>12</sup>     | 12.43 <sup>13</sup>     | protic         |

**Table S2** Maximum excitation and emission wavelengths ( $\lambda_{\text{ex}}$  and  $\lambda_{\text{em}}$ ) and FLI of 2-

MePh-KYNA in each solvent

| Solvents              | $\lambda_{\text{ex}}$ (nm) | $\lambda_{\text{em}}$ (nm) | FLI   |
|-----------------------|----------------------------|----------------------------|-------|
| 1 MeOH                | 348                        | 410                        | 301   |
| 2 EtOH                | 350                        | 391                        | 376   |
| 3 EG                  | 350                        | 403                        | 1161  |
| 4 Glyc                | 341                        | 410                        | 2024  |
| 5 IPA                 | 350                        | 417                        | 275.1 |
| 6 H <sub>2</sub> O    | 341                        | 416                        | 4943  |
| 7 TFE                 | 340                        | 419                        | 5503  |
| 8 AcOEt               | 302                        | 372                        | 75    |
| 9 THF                 | 303                        | 373                        | 36.3  |
| 10 DMSO               | 300                        | 365                        | 22.5  |
| 11 CH <sub>3</sub> CN | 307                        | 386                        | 88    |

## S. 5 References

1. G.R. Fulmer, A.J.M. Miller, N.H. Sherden, H.E. Gottlieb, A. Nudelman, B.M. Stoltz, J.E. Bercaw, K.I. Goldberg, NMR chemical shifts of trace impurities: Common laboratory solvents, organics, and gases in deuterated solvents relevant to the organometallic chemist, *Organometallics*, 2010, **29**, 2176–2179.
2. T. Sakamoto, M. Onozato, S. Uekusa, H. Ichiba, M. Umino, M. Shirao, T. Fukushima, Development of derivatization reagents bearing chiral 4-imidazolidinone for distinguishing primary amines from other amino acids and application to the liquid chromatography-tandem mass spectrometric analysis of miso, *J. Chromatogr. A*, 2021, **1652**, 462341.
3. M. Onozato, H. Nakanoue, T. Sakamoto, M. Umino, T. Fukushima, Determination of D- and L-amino acids in garlic foodstuffs by liquid chromatography–tandem mass spectrometry, *Molecules*, 2023, **28**(4), 1773.
4. E.R.H. Walter, J.A.G. Williams, D. Parker, Solvent polarity and oxygen sensitivity, rather than viscosity, determine lifetimes of biaryl-sensitised terbium luminescence, *Chem. Commun.*, 2017, **53**, 13344–13347.
5. S.L. Murov, Properties of solvents used in organic chemistry, [http://murov.info/orgsolvents.htm#Chemical\\_Properties](http://murov.info/orgsolvents.htm#Chemical_Properties) (accessed July 14, 2023).
6. P. Ballinger, F.A. Long, Acid ionization constants of alcohols. II. Acidities of some substituted methanols and related compounds<sup>1,2</sup>, *J. Am. Chem. Soc.*, 1960, **82**, 795–798.
7. A. Haring, A. Morris, M. Hu, Controlling morphological parameters of anodized titania nanotubes for optimized solar energy applications, *Materials*, 2012, **5**, 1890–1909.
8. PubChem, Compound summary: Glycerol, <https://pubchem.ncbi.nlm.nih.gov/compound/Glycerol> (accessed July 14, 2023).
9. T. Jarusuwannapoom, W. Hongrojjanawiwat, S. Jitjaicham, L. Wannatong, M. Nithitanakul, C. Pattamaprom, P. Koombhongse, R. Rangkupan, P. Supaphol, Effect of solvents on electro-spinnability of polystyrene solutions and morphological appearance of resulting electrospun polystyrene fibers, *Eur. Polym. J.*, 2005, **41**, 409–421.
10. D. Evans, D.H. Ripin, pKa values compilation, [https://organicchemistrydata.org/hansreich/resources/pka/pka\\_data/evans\\_pKa\\_table.pdf](https://organicchemistrydata.org/hansreich/resources/pka/pka_data/evans_pKa_table.pdf) (accessed July 14, 2023).

11. K.-S. Kim, H. Lee, Densities, viscosities, and surface tensions of the trifluoroethanol + quinoline system, *J. Chem. Eng. Data*, 2002, **47**, 216–218.
12. H.J.M. Al-Agealy, S.S. Al-Obaidi, S.R. Abbas, Theoretical investigation of electronic transfer rate for Au metal contact with bathocuproine BCP dye, *Mater. Sci. Forum*, 2021, **1039**, 363–372.
13. P. Ballinger, F.A. Long, Acid ionization constants of alcohols. I. Trifluoroethanol in the solvents H<sub>2</sub>O and D<sub>2</sub>O, *J. Am. Chem. Soc.*, 1959, **81**, 1050–1053.
